# Supplementary material
Source: Springer Nature journal article supplement (https://www.springermedizin.de/resource/supplementary/12883_2013_966_MOESM1_ESM.pdf/9456530)
Supplement: MOESM1 [file 9456530]

## ADDITIONAL FILE 1

**Table 1** AUCs for prediction of SICH calculated for the extended SITS SICH risk score with various weighting on TACI.

| Points allocated to TACI | AUC   |       |       |       |
|--------------------------|-------|-------|-------|-------|
|                          | 1     | 2     | 3     | 4     |
| SICH per NINDS           | 0.674 | 0.695 | 0.704 | 0.706 |
| SICH per ECASS II        | 0.672 | 0.692 | 0.703 | 0.706 |
| SICH per SITS-MOST       | 0.715 | 0.720 | 0.723 | 0.721 |

AUC indicates area under the receiver operating characteristic curve; ECASS: The European-Australasian Cooperative Acute Stroke Study; NINDS: National Institute of Neurological Disorders and Stroke; SICH: symptomatic intracerebral hemorrhage; SITS-MOST: the Safe Implementation of Thrombolysis in Stroke - Monitoring Study; TACI: total anterior circulation infarcts.

**Table 2** Interrater agreement of the Oxfordshire Community Stroke Project classification of stroke syndromes.

| Neurologist 2 | Neurologist 1 |             |            |            |           | Total       |
|---------------|---------------|-------------|------------|------------|-----------|-------------|
|               | TACI          | PACI        | POCI       | LACI       | Uncertain |             |
| TACI          | 167           | 13          | 9          | 0          | 0         | 189 (34.5%) |
| PACI          | 29            | 119         | 14         | 1          | 0         | 163 (29.7%) |
| POCI          | 14            | 3           | 27         | 0          | 0         | 44 (8.0%)   |
| LACI          | 4             | 65          | 11         | 69         | 0         | 149 (27.2%) |
| Uncertain     | 0             | 0           | 0          | 0          | 3         | 3 (0.5%)    |
| Total         | 214 (39.1%)   | 200 (36.5%) | 61 (11.1%) | 70 (12.8%) | 3 (0.5%)  | 548         |

LACI indicates lacunar infarcts; PACI: partial anterior circulation infarcts; POCI: posterior circulation infarcts; TACI: total anterior circulation infarcts.

**Table 3** Reclassification table comparing risk strata of SICH per NINDS.

| SITS SICH risk score                 | Extended risk score       |                           |                     | Total | Risk reclassification |        |       |
|--------------------------------------|---------------------------|---------------------------|---------------------|-------|-----------------------|--------|-------|
|                                      | 0% to <4%<br>(0-3 points) | 4% to 11%<br>(4-7 points) | >11%<br>(≥8 points) |       | Lower                 | Higher | Total |
| <b>0% to &lt;4%<br/>(0-2 points)</b> |                           |                           |                     |       |                       |        |       |
| At risk                              | 85                        | 18                        | 0                   | 103   | -                     | 18     | 18    |
| SICH                                 | 2                         | 1                         | 0                   | 3     | -                     | 1      | 1     |
| No SICH                              | 83                        | 17                        | 0                   | 100   | -                     | 17     | 17    |
| Observed risk                        | 2.4%                      | 5.6%                      | -                   | 2.9%  | -                     | -      | -     |
| <b>4% to 11%<br/>(3-5 points)</b>    |                           |                           |                     |       |                       |        |       |
| At risk                              | 113                       | 194                       | 55                  | 362   | 113                   | 55     | 168   |
| SICH                                 | 3                         | 16                        | 6                   | 25    | 3                     | 6      | 9     |
| No SICH                              | 110                       | 178                       | 49                  | 337   | 110                   | 49     | 159   |
| Observed risk                        | 2.7%                      | 8.2%                      | 10.9%               | 6.9%  | -                     | -      | -     |
| <b>&gt;11%<br/>(≥6 points)</b>       |                           |                           |                     |       |                       |        |       |
| At risk                              | 4                         | 28                        | 51                  | 83    | 32                    | -      | 32    |
| SICH                                 | 0                         | 1                         | 11                  | 12    | 1                     | -      | 1     |
| No SICH                              | 4                         | 27                        | 40                  | 71    | 31                    | -      | 31    |
| Observed risk                        | 0.0%                      | 3.6%                      | 21.6%               | 14.5% | -                     | -      | -     |
| <b>Total</b>                         |                           |                           |                     |       |                       |        |       |
| At risk                              | 202                       | 240                       | 106                 | 548   | 145                   | 73     | 218   |
| SICH                                 | 5                         | 18                        | 17                  | 40    | 4                     | 7      | 11    |
| No SICH                              | 197                       | 222                       | 89                  | 508   | 141                   | 66     | 207   |
| Observed risk                        | 2.5%                      | 7.5%                      | 16.0%               | 7.3%  | -                     | -      | -     |

NINDS indicates National Institute of Neurological Disorders and Stroke; SICH: symptomatic intracerebral hemorrhage; SITS: the Safe Implementation of Thrombolysis in Stroke.

Red background refers to an increase in risk stratum; blue background to a decrease in risk stratum.

**Table 4** Reclassification table comparing risk strata of SICH per ECASS II.

| SITS SICH risk score                 | Extended risk score       |                          |                    | Total | Risk reclassification |        |       |
|--------------------------------------|---------------------------|--------------------------|--------------------|-------|-----------------------|--------|-------|
|                                      | 0% to <3%<br>(0-3 points) | 3% to 8%<br>(4-7 points) | >8%<br>(≥8 points) |       | Lower                 | Higher | Total |
| <b>0% to &lt;3%<br/>(0-2 points)</b> |                           |                          |                    |       |                       |        |       |
| At risk                              | 85                        | 18                       | 0                  | 103   | -                     | 18     | 18    |
| SICH                                 | 1                         | 1                        | 0                  | 2     | -                     | 1      | 1     |
| No SICH                              | 84                        | 17                       | 0                  | 101   | -                     | 17     | 17    |
| Observed risk                        | 1.2%                      | 5.6%                     | -                  | 1.9%  | -                     | -      | -     |
| <b>3% to 8%<br/>(3-5 points)</b>     |                           |                          |                    |       |                       |        |       |
| At risk                              | 113                       | 194                      | 55                 | 362   | 113                   | 55     | 168   |
| SICH                                 | 2                         | 13                       | 3                  | 18    | 2                     | 3      | 5     |
| No SICH                              | 111                       | 181                      | 52                 | 344   | 111                   | 52     | 163   |
| Observed risk                        | 1.8%                      | 6.7%                     | 5.5%               | 5.0%  | -                     | -      | -     |
| <b>&gt;8%<br/>(≥6 points)</b>        |                           |                          |                    |       |                       |        |       |
| At risk                              | 4                         | 28                       | 51                 | 83    | 32                    | -      | 32    |
| SICH                                 | 0                         | 0                        | 9                  | 9     | 0                     | -      | 0     |
| No SICH                              | 4                         | 28                       | 42                 | 74    | 32                    | -      | 32    |
| Observed risk                        | 0.0%                      | 0.0%                     | 17.6%              | 10.8% | -                     | -      | -     |
| <b>Total</b>                         |                           |                          |                    |       |                       |        |       |
| At risk                              | 202                       | 240                      | 106                | 548   | 145                   | 73     | 218   |
| SICH                                 | 3                         | 14                       | 12                 | 29    | 2                     | 4      | 6     |
| No SICH                              | 199                       | 226                      | 94                 | 519   | 143                   | 69     | 212   |
| Observed risk                        | 1.5%                      | 5.8%                     | 11.3%              | 5.3%  | -                     | -      | -     |

ECASS indicates The European-Australasian Cooperative Acute Stroke Study; SICH: symptomatic intracerebral hemorrhage; SITS: the Safe Implementation of Thrombolysis in Stroke.

Red background refers to an increase in risk stratum; blue background to a decrease in risk stratum.

**Table 5** Reclassification table comparing risk strata of SICH per SITS-MOST.

| SITS SICH risk score                 | Extended risk Score       |                          |                    | Total | Risk reclassification |        |       |
|--------------------------------------|---------------------------|--------------------------|--------------------|-------|-----------------------|--------|-------|
|                                      | 0% to <2%<br>(0-3 points) | 2% to 5%<br>(4-7 points) | >5%<br>(≥8 points) |       | Lower                 | Higher | Total |
| <b>0% to &lt;2%<br/>(0-2 points)</b> |                           |                          |                    |       |                       |        |       |
| At risk                              | 85                        | 18                       | 0                  | 103   | -                     | 18     | 18    |
| SICH                                 | 0                         | 1                        | 0                  | 1     | -                     | 1      | 1     |
| No SICH                              | 85                        | 17                       | 0                  | 102   | -                     | 17     | 17    |
| Observed risk                        | 0.0%                      | 5.6%                     | -                  | 1.0%  | -                     | -      | -     |
| <b>2% to 5%<br/>(3-5 points)</b>     |                           |                          |                    |       |                       |        |       |
| At risk                              | 113                       | 194                      | 55                 | 362   | 113                   | 55     | 168   |
| SICH                                 | 1                         | 8                        | 2                  | 11    | 1                     | 2      | 3     |
| No SICH                              | 112                       | 186                      | 53                 | 351   | 112                   | 53     | 165   |
| Observed risk                        | 0.9%                      | 4.1%                     | 3.6%               | 3.0%  | -                     | -      | -     |
| <b>&gt;5%<br/>(≥6 points)</b>        |                           |                          |                    |       |                       |        |       |
| At risk                              | 4                         | 28                       | 51                 | 83    | 32                    | -      | 32    |
| SICH                                 | 0                         | 0                        | 7                  | 7     | 0                     | -      | 0     |
| No SICH                              | 4                         | 28                       | 44                 | 76    | 32                    | -      | 32    |
| Observed risk                        | 0.0%                      | 0.0%                     | 13.7%              | 8.4%  | -                     | -      | -     |
| <b>Total</b>                         |                           |                          |                    |       |                       |        |       |
| At risk                              | 202                       | 240                      | 106                | 548   | 145                   | 73     | 218   |
| SICH                                 | 1                         | 9                        | 9                  | 19    | 1                     | 3      | 4     |
| No SICH                              | 201                       | 231                      | 97                 | 529   | 144                   | 70     | 214   |
| Observed risk                        | 0.5%                      | 3.8%                     | 8.5%               | 3.5%  | -                     | -      | -     |

SICH indicates symptomatic intracerebral hemorrhage; SITS-MOST: the Safe Implementation of Thrombolysis in Stroke - Monitoring Study.

Red background refers to an increase in risk stratum; blue background to a decrease in risk stratum.
